# Supplementary material for: Dual-potential electrochemiluminescent film constructed from single AIE luminogens for the sensitive detection of malachite green
Source: Royal Society of Chemistry journal article supplement (doi:10.1039/d2nr01009g), 2022-01-01
Supplement: d2nr01009g1.pdf [file d2nr01009g1.pdf]

Supporting Information for

## **Dual-potential electrochemiluminescence film constructed from single AIE luminogens for sensitive detection of malachite green**

Zihua Li,<sup>\*a</sup> Yusheng Zhou,<sup>a</sup> Yuhan Cui<sup>a</sup> and Guodong Liang<sup>\*a</sup>

<sup>a</sup>PCFM lab, School of Materials Science and Engineering, Sun Yat-Sen University, Guangzhou, 510275, China.

---

\* Corresponding author: Tel: +86-20-84004033; Fax: +86-20-84004033

E-mail address: lizh259@mail2.sysu.edu.cn; lgdong@mail.sysu.edu.cn

## 1. Supplementary Table and Figures

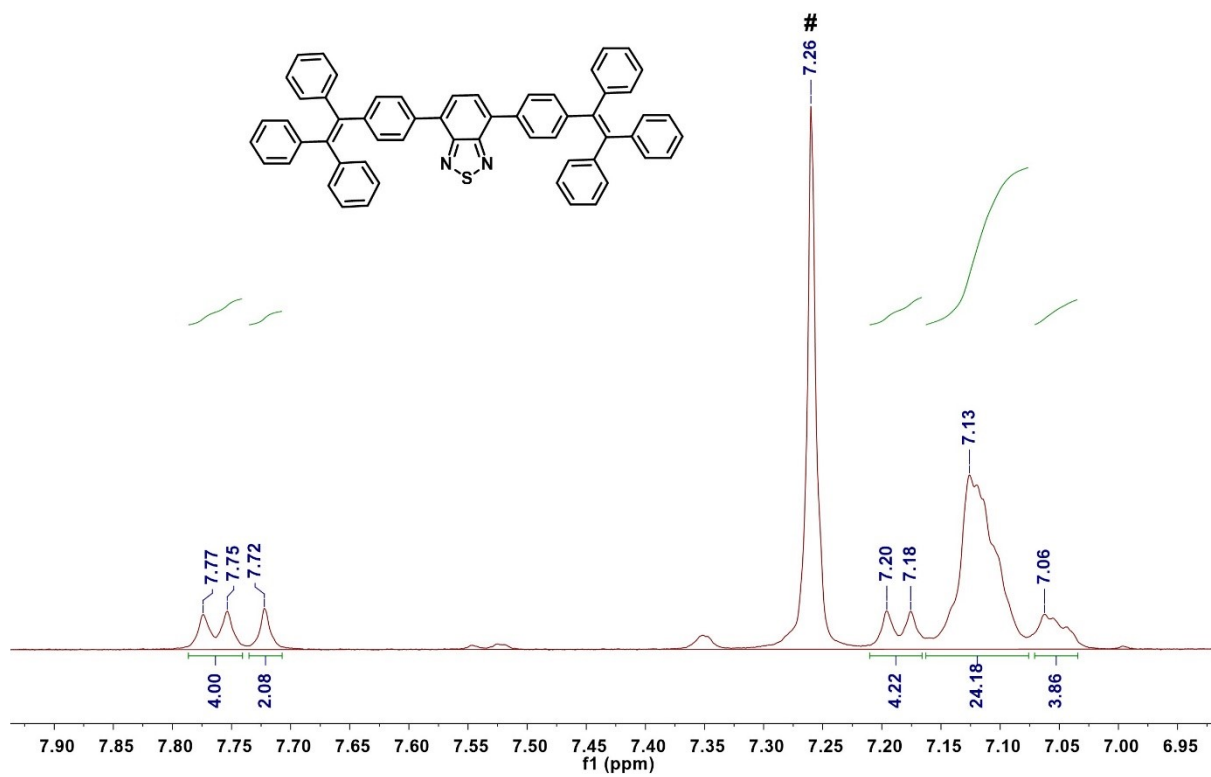

**Fig. S1** <sup>1</sup>H NMR spectrum of BTPEBT in CDCl<sub>3</sub> (# CDCl<sub>3</sub>).

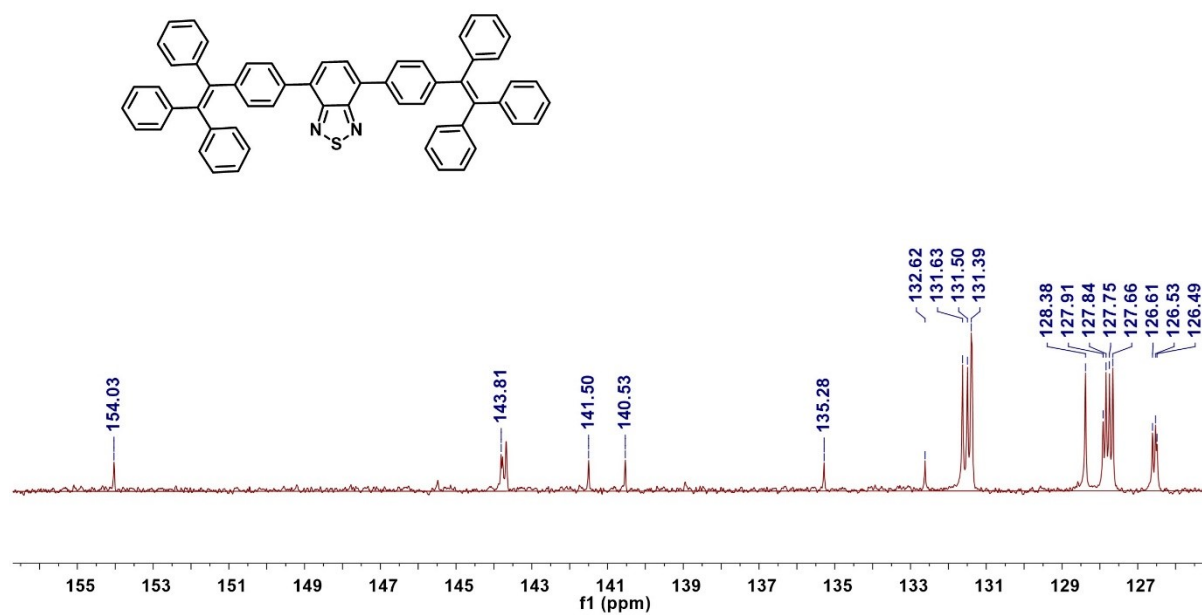

**Fig. S2**  $^{13}\text{C}$  NMR spectrum of **BTPEBT** in  $\text{CDCl}_3$ .

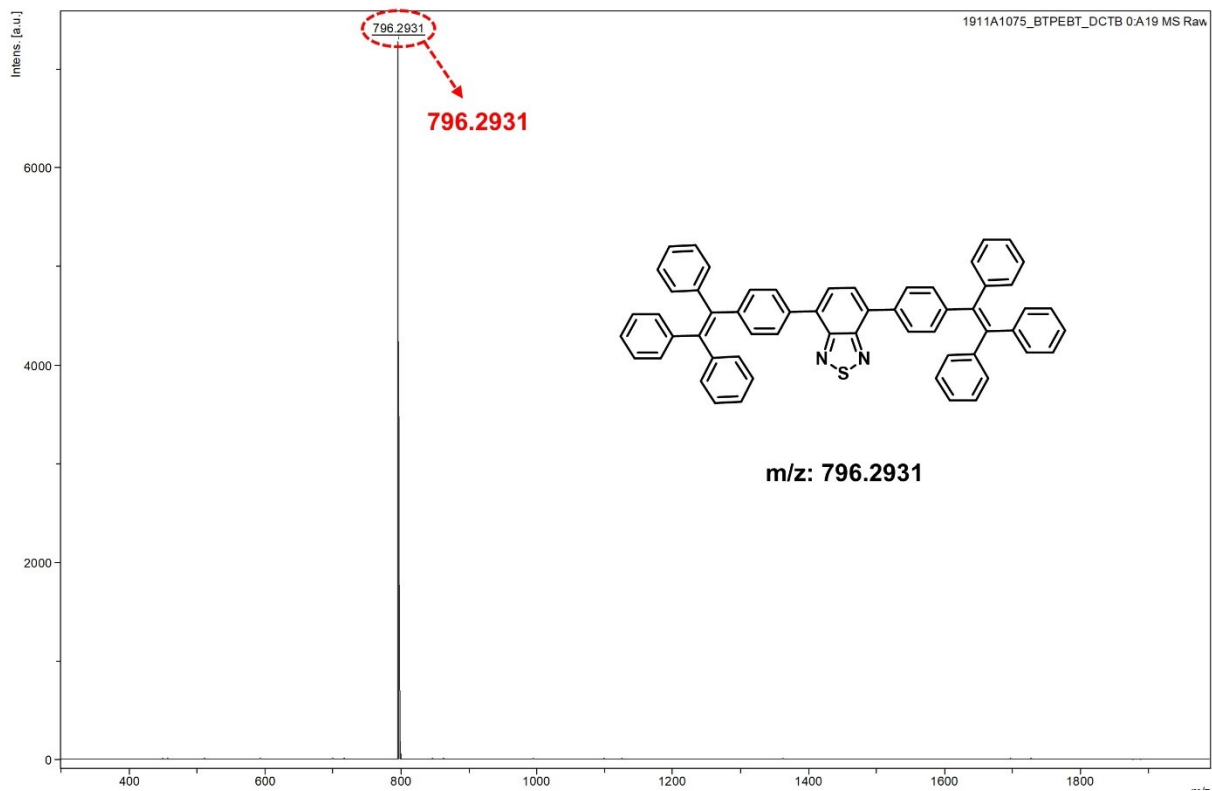

**Fig. S3** HRMS spectrum of **BTPEBT**.

**Table S1.** The absorption and emission wavelength of **BTPEBT** in different solvents.

| Compound      | $\lambda_{ab}$ [nm] |     |     |     |     |     | $\lambda_{PL}$ [nm] |     |     |     |     |     |
|---------------|---------------------|-----|-----|-----|-----|-----|---------------------|-----|-----|-----|-----|-----|
|               | CH                  | Tol | DO  | THF | DCM | DMF | CH                  | Tol | DO  | THF | DCM | DMF |
| <b>BTPEBT</b> | 418                 | 418 | 418 | 418 | 419 | 420 | 513                 | 527 | 533 | 541 | 556 | 572 |

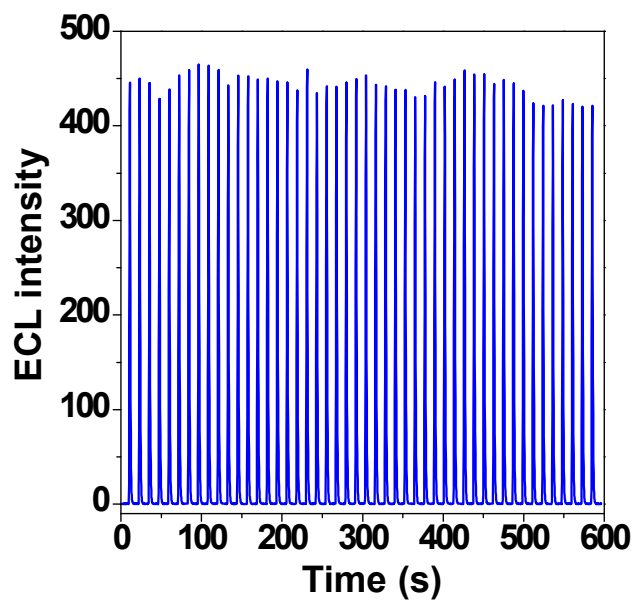

**Fig. S4** ECL light transients of **BTPEBT** in DCM solution.

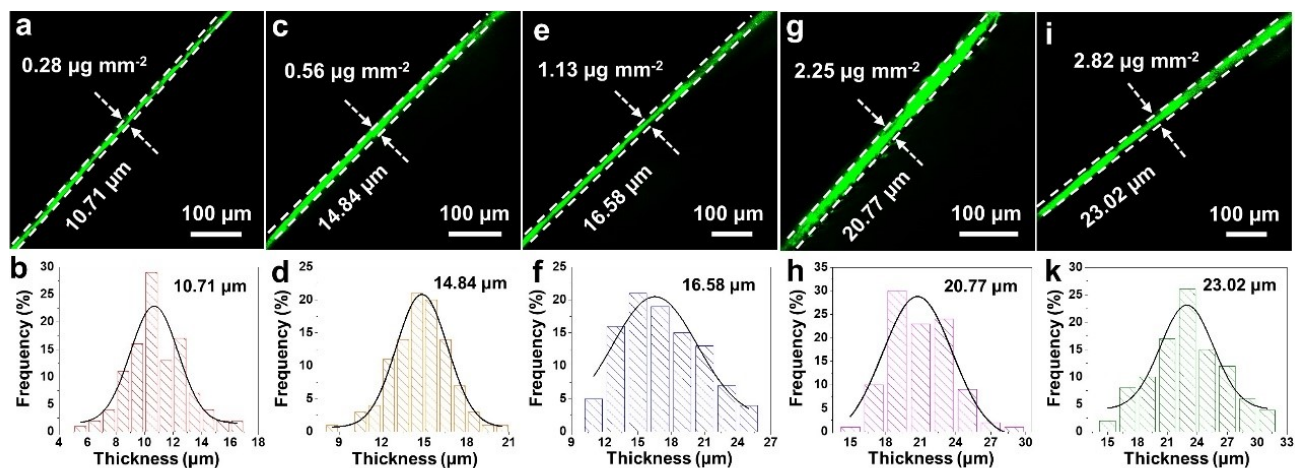

**Fig. S5** Fluorescence microscopy images and thickness distribution of **BTPEBT** films on GCE at various loadings of (a) and (b)  $0.28 \mu\text{g mm}^{-2}$ , (c) and (d)  $0.56 \mu\text{g mm}^{-2}$ , (e) and (f)  $1.13 \mu\text{g mm}^{-2}$ , (g) and (h)  $2.25 \mu\text{g mm}^{-2}$ , and (i) and (k)  $2.82 \mu\text{g mm}^{-2}$ .

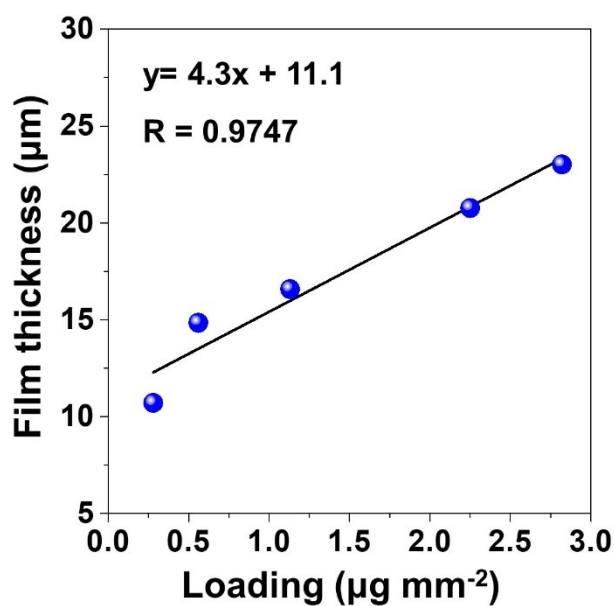

**Fig. S6** Plots of thickness of **BTPEBT** film on GCE versus various luminogen loadings.

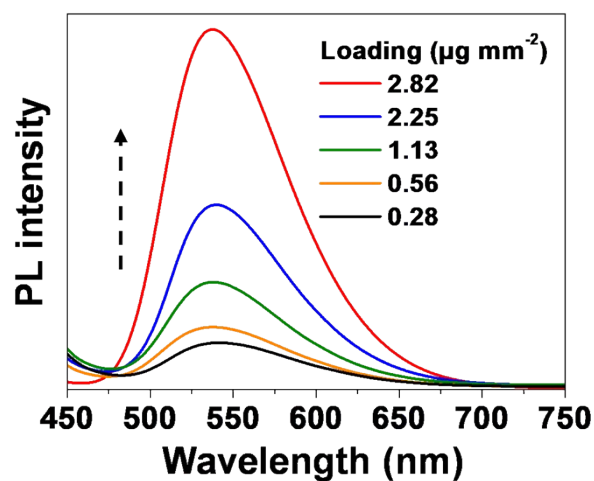

**Fig. S7** PL spectra of **BTPEBT** films at various loadings.  $\lambda_{\text{ex}} = 400$  nm.

**Table S2.** Fluorescence quantum yield ( $\Phi_{\text{F}}$ ) of solid-state **BTPEBT** films and powder.

| <b>BTPEBT</b>                     | <b>Film</b> |       |       |       |       | <b>Powder</b> |
|-----------------------------------|-------------|-------|-------|-------|-------|---------------|
| Loading ( $\mu\text{g mm}^{-2}$ ) | 0.28        | 0.56  | 1.13  | 2.25  | 2.82  |               |
| $\Phi_{\text{F}}$ (%)             | 46.44       | 50.18 | 58.62 | 58.94 | 60.71 | 69.8          |

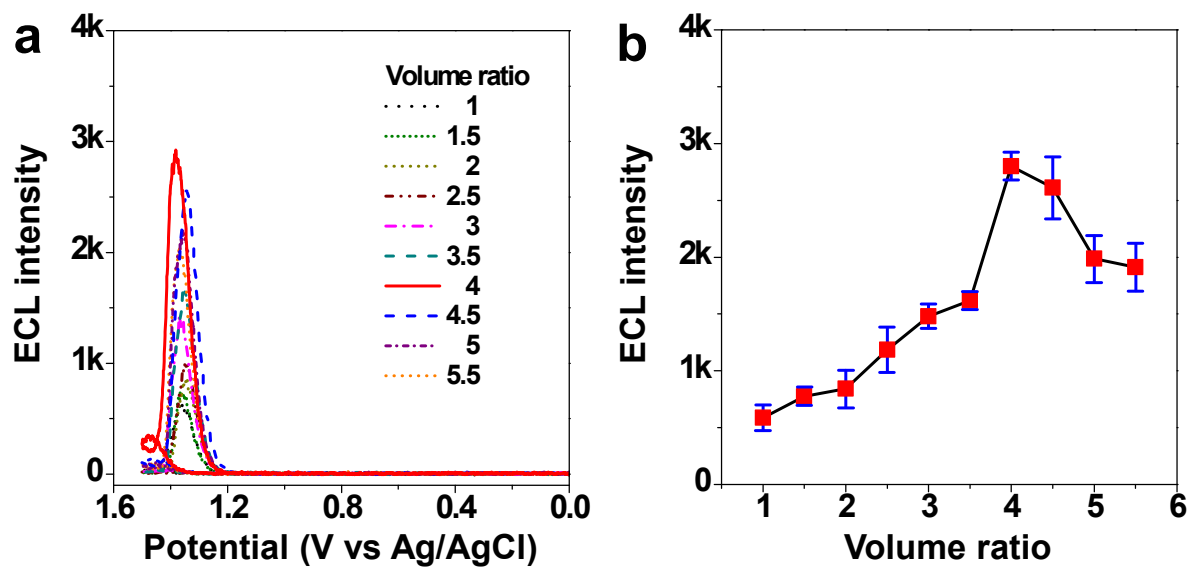

**Fig. S8** Optimized ECL intensity of **BTPEBT** films in MeCN/H<sub>2</sub>O mixtures containing 20 mM TPrA.

(a) ECL profiles and (b) plots of ECL emission maximum with varied volume ratios of mixtures.



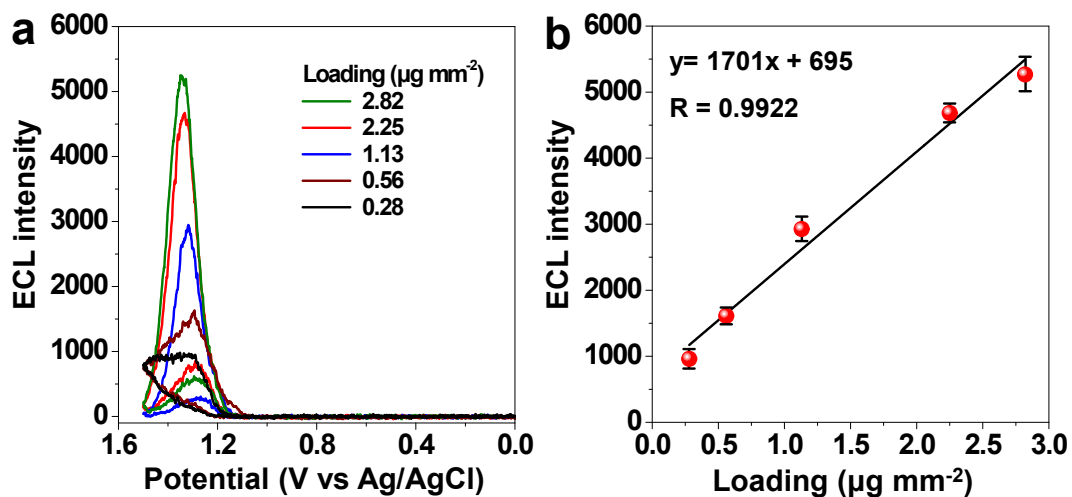

**Fig. S9** (a) ECL intensity of the BTPEBT film with different luminogen loadings. (b) Plots of ECL intensity versus different luminogen loadings.

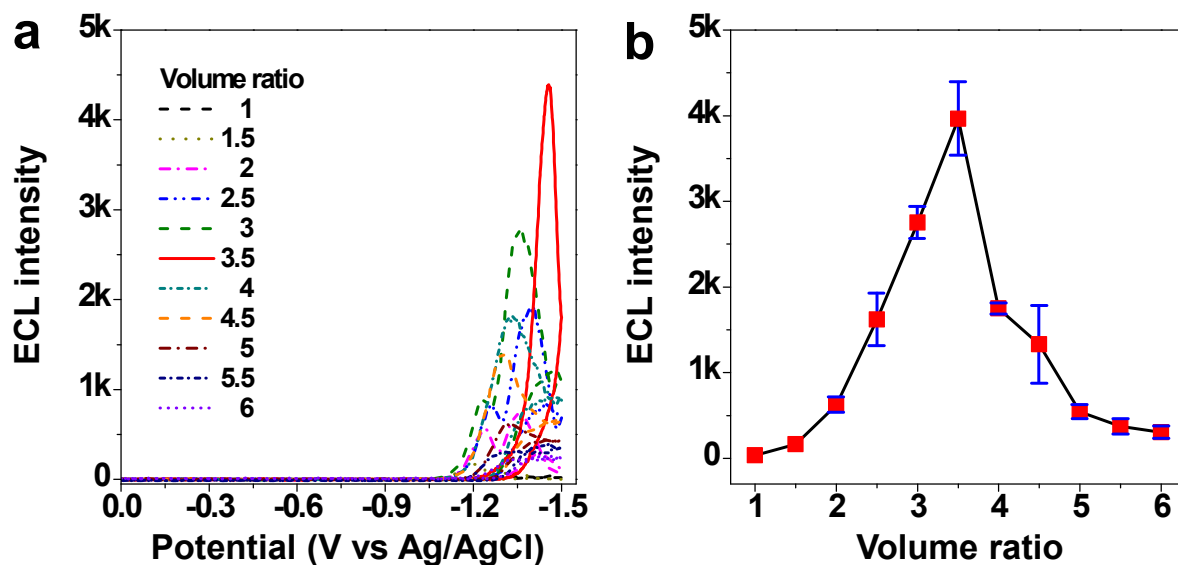

**Fig. S10** Optimized ECL intensity of BTPEBT films in MeCN/H<sub>2</sub>O mixtures containing 30 mM K<sub>2</sub>S<sub>2</sub>O<sub>8</sub>. (a) ECL profiles and (b) plots of ECL emission maximum with varied volume ratios of mixtures.

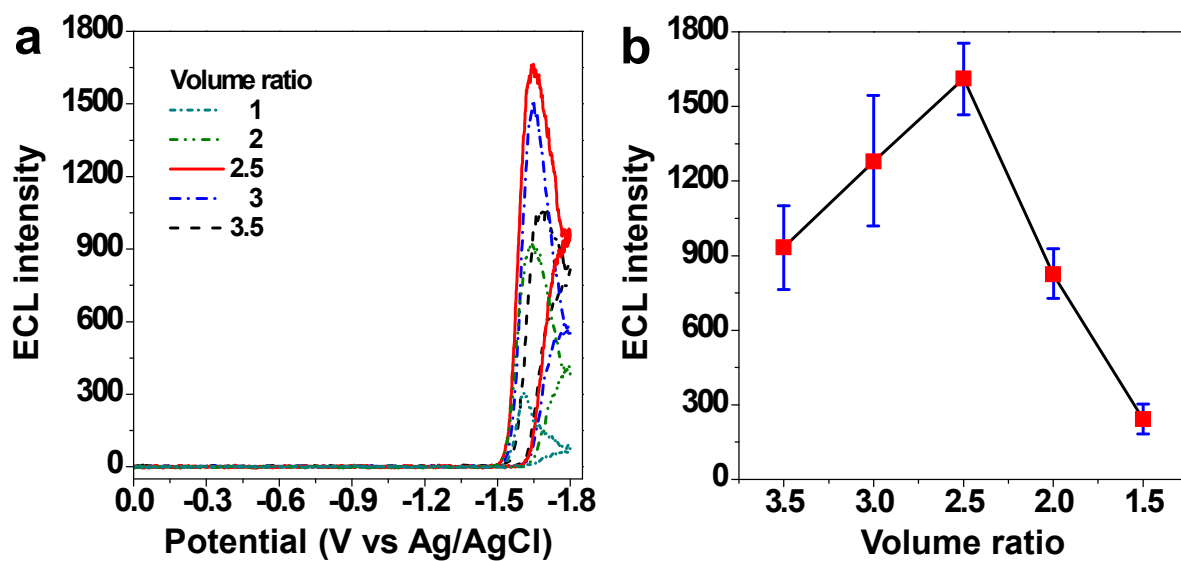

**Fig. S11** Optimized ECL intensity of **BTPEBT** films in MeCN/H<sub>2</sub>O mixtures containing 32 mM BPO.

(a) ECL profiles and (b) plots of ECL emission maximum with varied volume ratios of mixtures.

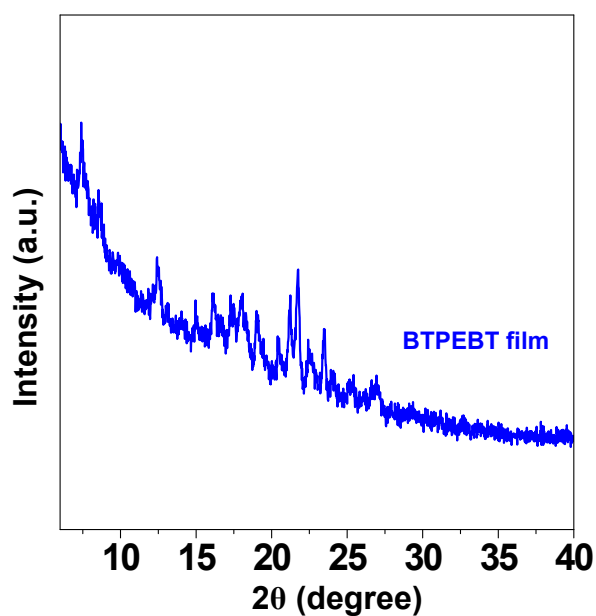

**Fig. S12** XRD pattern of the **BTPEBT** film.

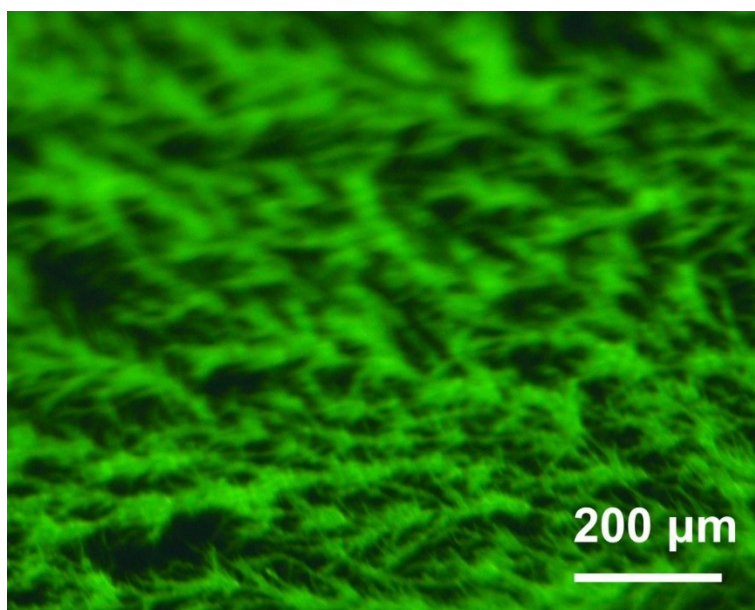

**Fig. S13** Fluorescence microscopy image of **BTPEBT** crystals.

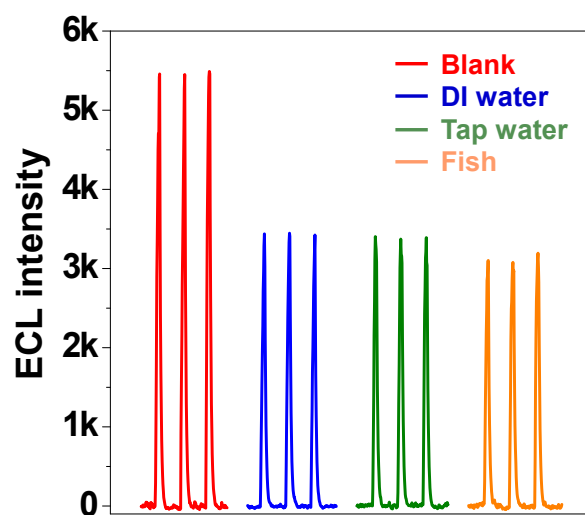

**Fig. S14** ECL intensity of the **BTPEBT** film in different MG-spiked samples.

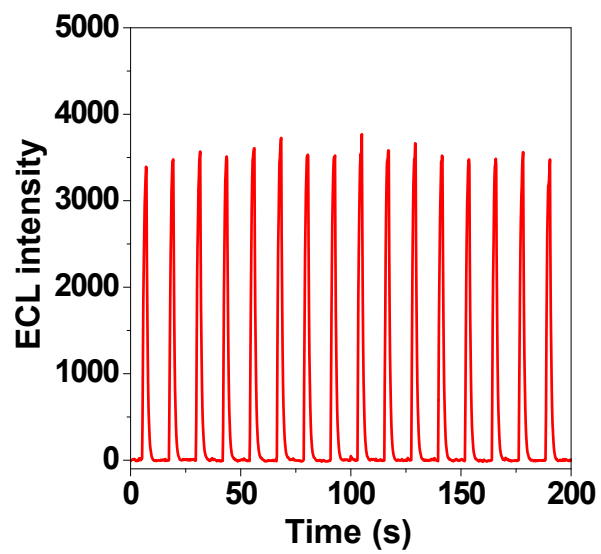

**Fig. S15** ECL stability of the recycled **BTPEBT** film with 20 mM TPrA as coreactants.

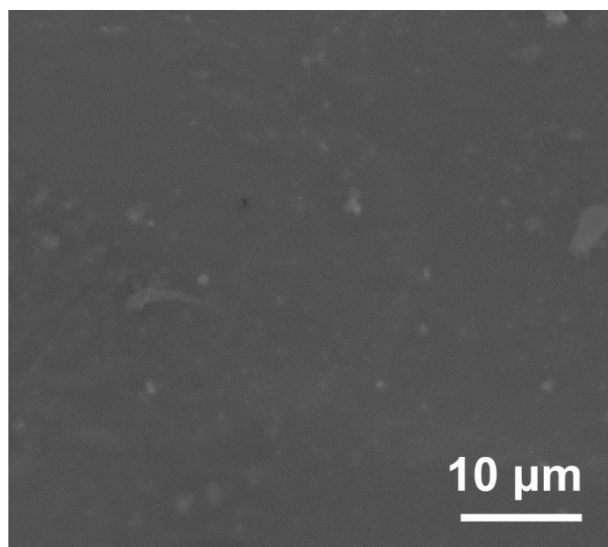

**Fig. S16** SEM image of the **BTPEBT** film on GCE after ECL detection.

## 2. Determination of ECL efficiency

The ECL efficiencies were calculated using the Ru(bpy)<sub>3</sub><sup>2+</sup>/TprA system as reference ( $\Phi_{\text{ECL}} = 5.0\%$ )

by integration of both ECL intensity and current value versus time for each compound, as described in

Equation (S1)

$$\Phi_x = 100\% \times \left[ \frac{\int_a^b ECLdt}{\int_a^b Currentdt} \right]_x / \left[ \frac{\int_a^b ECLdt}{\int_a^b Currentdt} \right]_{st} \quad (\text{S1})$$

where  $x$  stands for **BTPEBT**, and  $st$  represents Ru(bpy)<sub>3</sub><sup>2+</sup>.
